# Supplementary material for: Differential pulse adsorptive stripping voltammetric determination of nanomolar levels of atorvastatin calcium in pharmaceutical and biological samples using a vertically aligned carbon nanotube/graphene oxide electrode
Source: Royal Society of Chemistry journal article supplement (doi:10.1039/c4an00111g), 2014-01-01
Supplement: c4an00111g1.pdf [file c4an00111g1.pdf]

## Electronic Supplementary Information for the Paper

### Differential pulse adsorptive stripping voltammetric determination of nanomolar levels of atorvastatin calcium in pharmaceutical and biological samples using a vertically aligned carbon nanotubes/graphene oxide electrode

Tiago Almeida Silva<sup>a</sup>, Hudson Zanin<sup>b</sup>, Fernando Campanhã Vicentini<sup>a</sup>, Evaldo José Corat<sup>b</sup>, Orlando Fatibello-Filho<sup>a\*</sup>

<sup>a</sup> Department of Chemistry, Federal University of São Carlos, Rod. Washington Luís km 235, P. O. Box 676, São Carlos, CEP: 13560-970, SP, Brazil.

<sup>b</sup> Associated Laboratory of Sensors and Materials of the National Institute for Space Research, Av. dos Astronautas 1758, São José dos Campos, CEP: 12227-010, SP, Brazil.

\* Corresponding author.

Tel.: +55 16 33518098; Fax: +55 16 33518350

E-mail address: bello@ufscar.br (O. Fatibello-Filho)

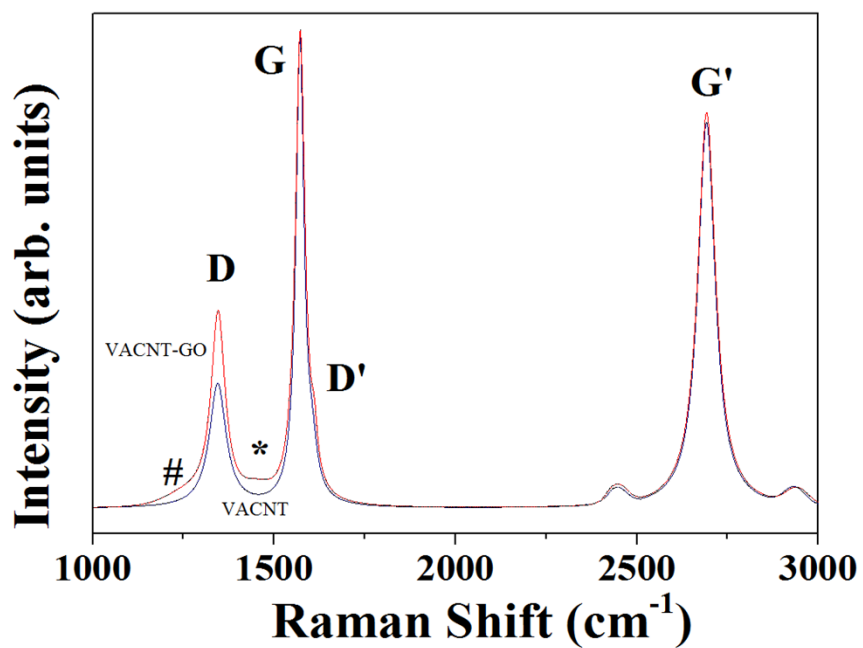

**Figure S1** First and second-order Raman spectra of VACNT and VACNT-GO films. The (\*) band in the Raman spectrum is probably a point on phonon dispersion curve and (#) band is maybe correlated with the polar groups attached on CNT walls. The overall experimental spectra have been deconvoluted and fitted to constituent spectral lines (not shown), as detailed in the text.

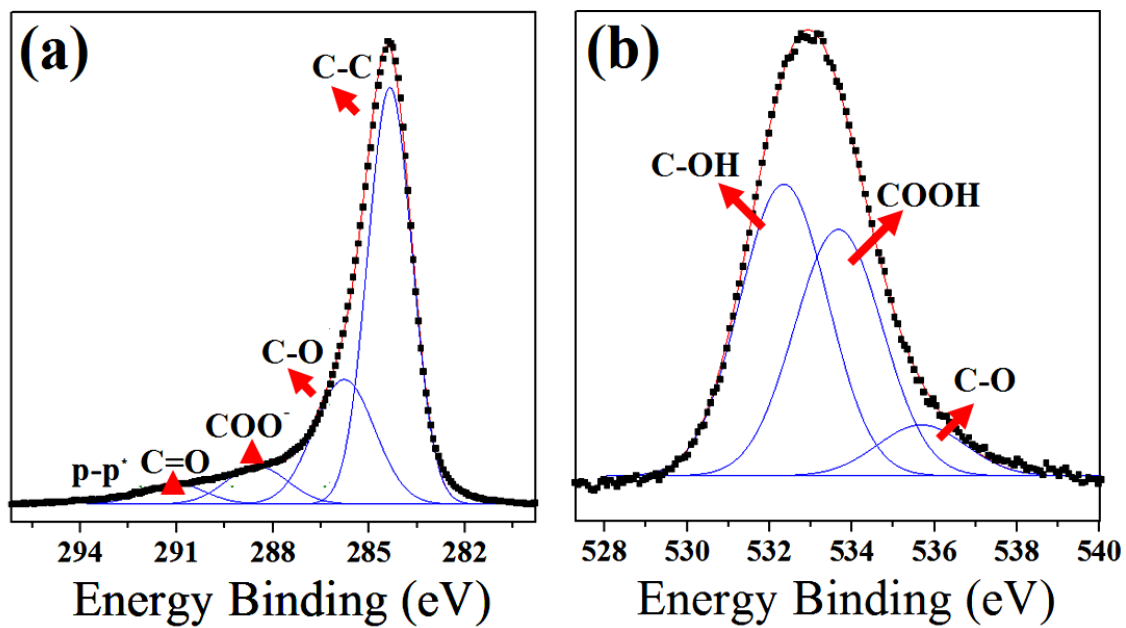

**Figure S2** XPS spectra of the carbon nanotube/graphene oxide nanocomposite: (a) and (b) show the deconvolution of the regions containing C and O, respectively. Ref needed for where these peaks are.

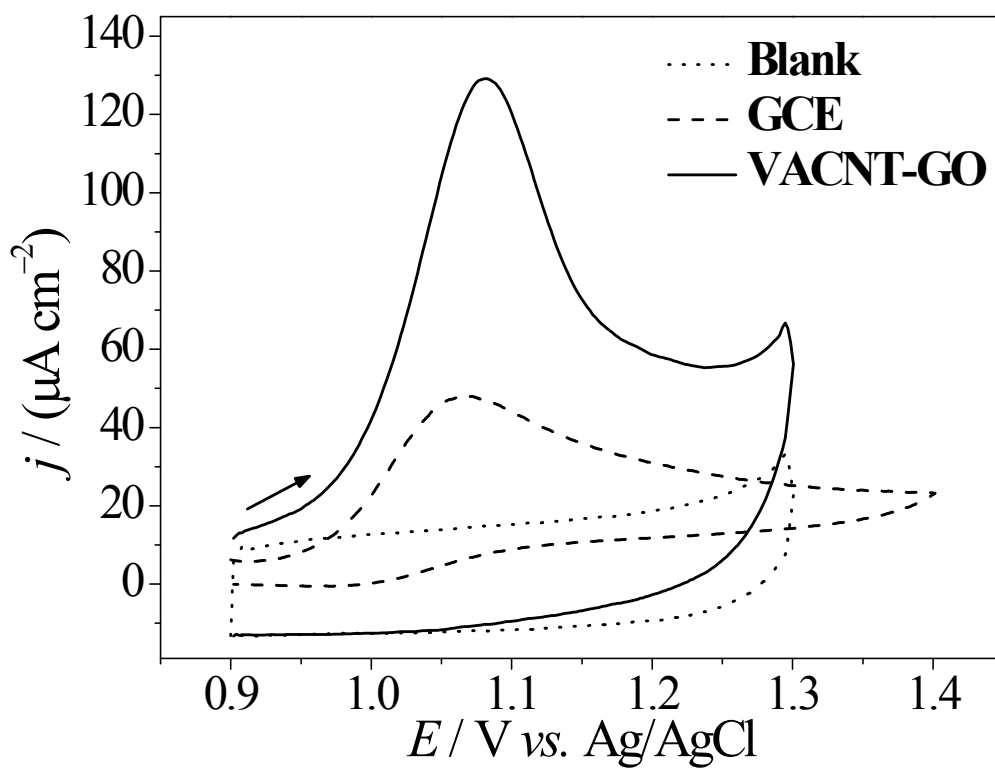

**Figure S3** Cyclic voltammograms obtained using the VACNT-GO electrode and a Glassy Carbon Electrode (GCE) in 0.2 mol L<sup>-1</sup> buffer phosphate (pH<sub>cond</sub> 2.0, 20% (v/v) methanol) containing 5.0 × 10<sup>-5</sup> mol L<sup>-1</sup>ATOR (VACNT-GO) or 1.0 × 10<sup>-4</sup> mol L<sup>-1</sup>ATOR (GCE).

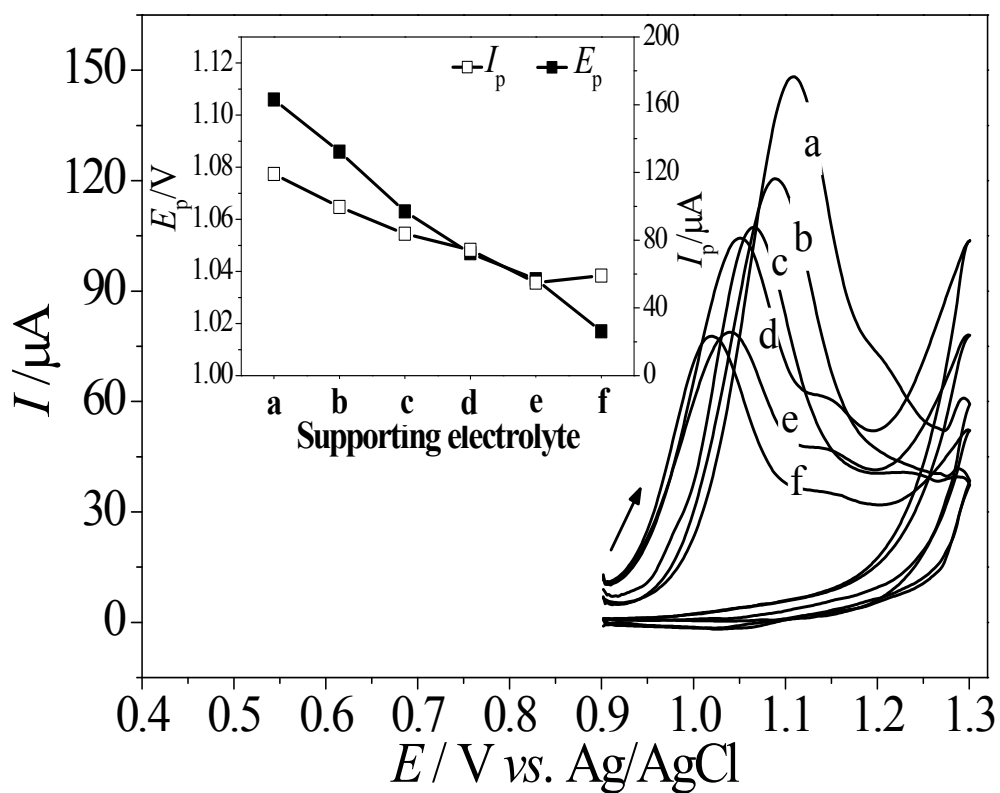

**Figure S4** Cyclic voltammograms obtained for a  $5.0 \times 10^{-5}$  mol L<sup>-1</sup> ATOR solution in different supporting electrolytes contained 20% (v/v) methanol: (a) 0.2 mol L<sup>-1</sup> buffer phosphate (pH<sub>cond</sub> 4.5); (b) 0.1 mol L<sup>-1</sup> H<sub>2</sub>SO<sub>4</sub>; (c) 0.5 mol L<sup>-1</sup> H<sub>2</sub>SO<sub>4</sub>; (d) 0.2 mol L<sup>-1</sup> buffer acetate (pH<sub>cond</sub> 4.5); (e) 0.04 mol L<sup>-1</sup> Britton-Robinson (BR) buffer (pH<sub>cond</sub> 4.5) and (f) 0.1 mol L<sup>-1</sup> KCl using the VACNT-GO electrode. Inset  $E_p$  and  $I_p$  vs. supporting electrolyte.  $\nu = 50$  mV s<sup>-1</sup>.

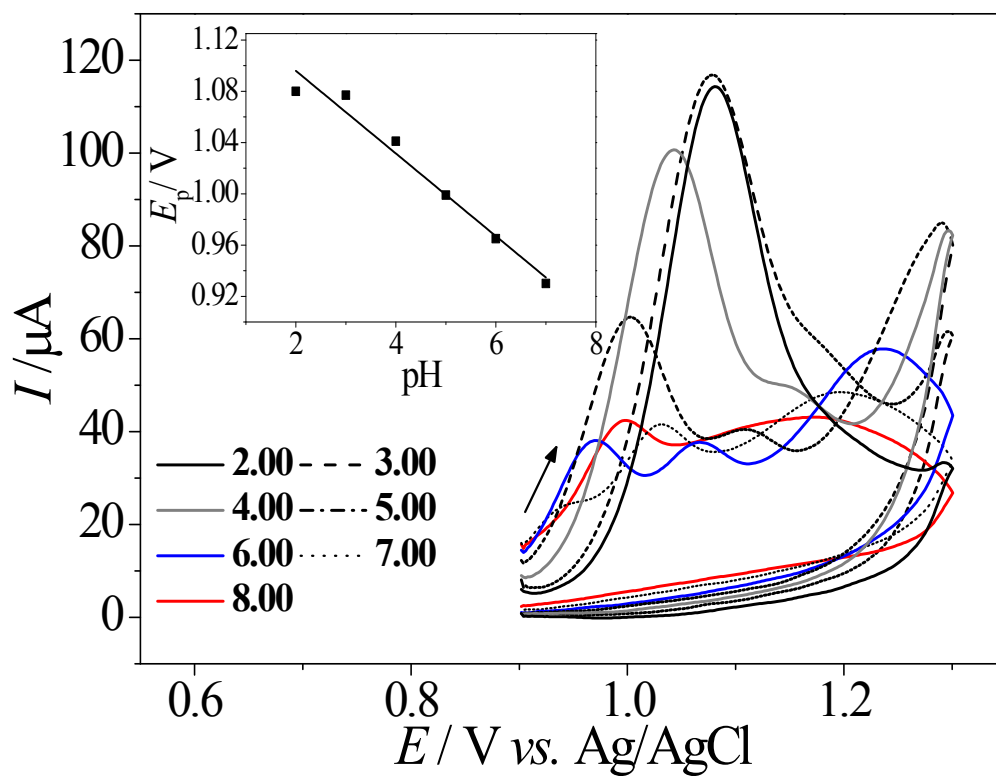

**Figure S5** Cyclic voltammograms recorded for a  $5.0 \times 10^{-5} \text{ mol L}^{-1}$  ATOR solution in  $0.2 \text{ mol L}^{-1}$  phosphate buffer (20 % v/v methanol) at different conditional pHs using the VACNT-GO electrode. Inset  $E_p$  vs. pH.  $\nu = 50 \text{ mV s}^{-1}$ .

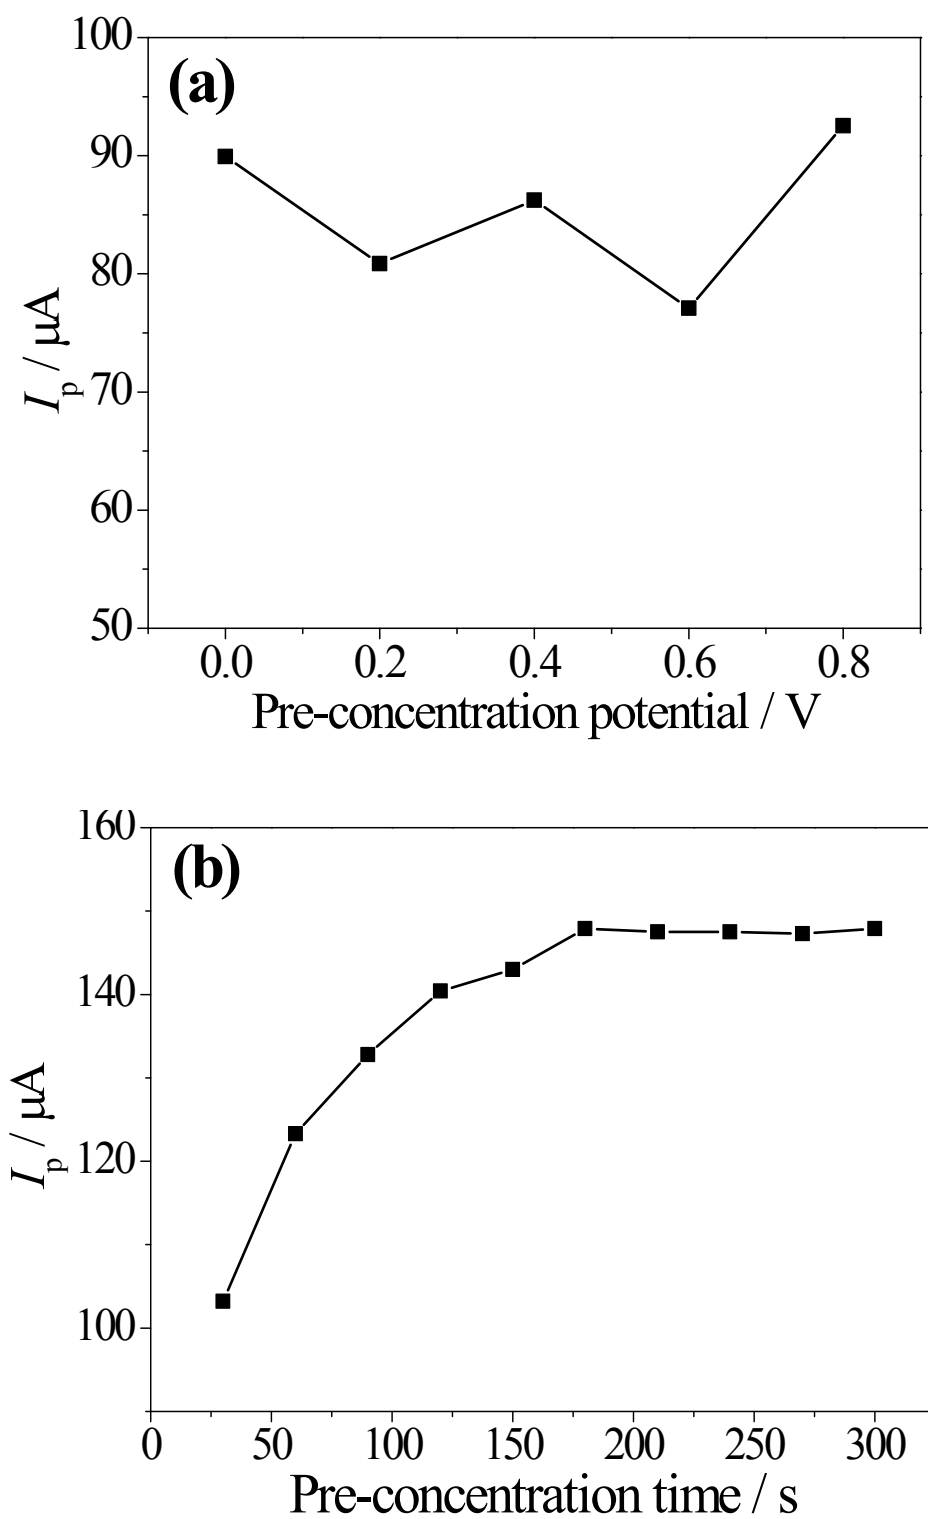

**Figure S6** Effect of the (a) pre-concentration potential and (b) pre-concentration time on the peak current.
